# Supplementary material for: In situ synthesis of hierarchical structured cotton fibers/MnO2 composites: a versatile and recyclable device for wastewater treatment
Source: Royal Society of Chemistry journal article supplement (doi:10.1039/c7ra04287f), 2017-01-01
Supplement: c7ra04287f1.pdf [file c7ra04287f1.pdf]

## Supplementary Material

### **In situ synthesis of hierarchical structured cotton fibers/MnO<sub>2</sub> composites: a versatile and recyclable device for wastewater treatment**

Chenlu Jiao<sup>a</sup>, Jin Tao<sup>a</sup>, Sijun Xu<sup>b</sup>, Desuo Zhang<sup>a</sup>, Yuyue Chen<sup>a</sup>, Hong Lin<sup>a,\*</sup>

<sup>a</sup> *National Engineering Laboratory for Modern Silk, College of Textile and Clothing Engineering, Soochow University, Suzhou 215123, P.R. China*

<sup>b</sup> *School of Textile and Clothing, Nantong University, Jiangsu 226019, PR China*

\* Corresponding author at: Soochow University, No. 199 Renai Road, Suzhou 215123, PR China. Tel.: +86 18962529370. Fax: +86 512 67487152.

E-mail address: [linhong523@suda.edu.cn](mailto:linhong523@suda.edu.cn) (H. Lin)

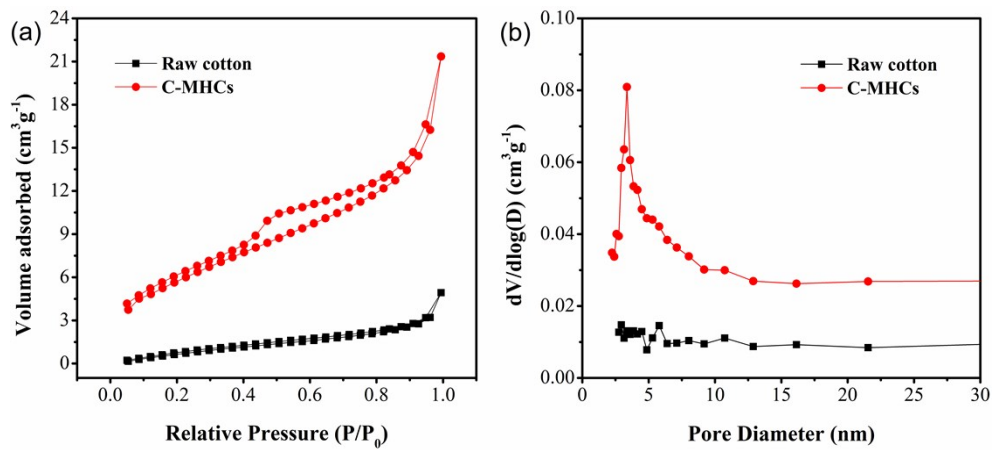

**Fig. S1** (a) Nitrogen sorption isotherms and (b) the pore size distribution curves of raw cotton and C-MHCs prepared by 0.020 mol L<sup>-1</sup>.

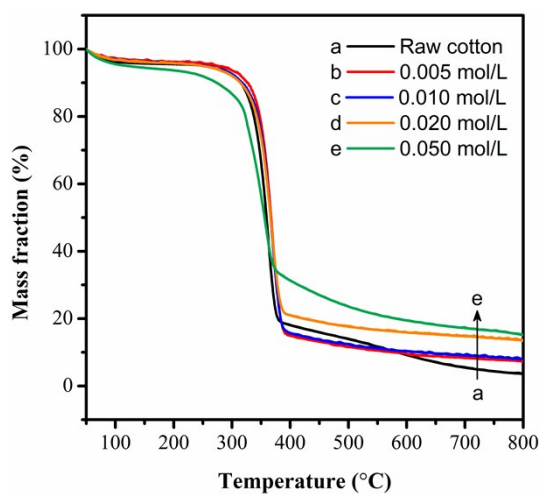

**Fig. S2.** TG behaviors of C-MHCs prepared by various precursor concentrations.

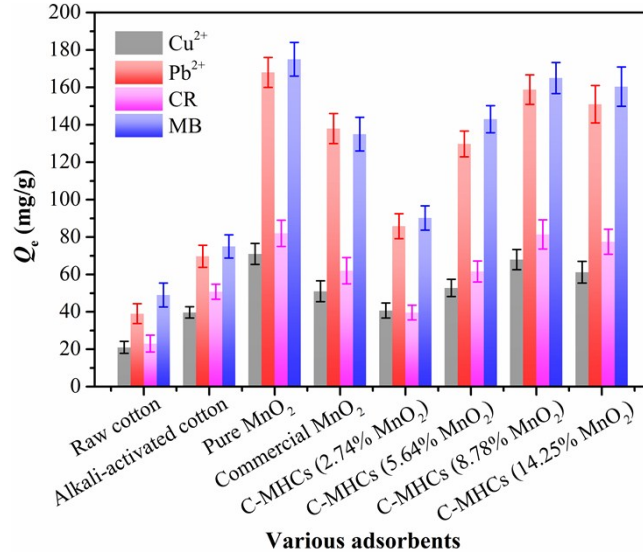

**Fig. S3.** Comparison adsorption studies of raw cotton, alkali-activated cotton, pure MnO<sub>2</sub> nanoparticles, commercial MnO<sub>2</sub> nanoparticles and C-MHCs with various loading amounts of MnO<sub>2</sub>. (Adsorption condition: 500 mg L<sup>-1</sup>; 4 h; pH=5.5, 5.4, 9.2 and 5.8, for Cu<sup>2+</sup>, Pb<sup>2+</sup>, CR and MB)

**Table S1** Pore structure characteristics of raw cotton and C-MHCs

| Sample     | Total pore volume<br>(cm <sup>3</sup> g <sup>-1</sup> ) | BET Surface area<br>(m <sup>2</sup> g <sup>-1</sup> ) |
|------------|---------------------------------------------------------|-------------------------------------------------------|
| Raw cotton | 0.0267                                                  | 5.7660                                                |
| C-MHCs     | 0.0778                                                  | 21.7221                                               |
